# Supplementary material for: Key changes in gene expression identified for different stages of C4 evolution in Alloteropsis semialata
Source: PubMed Central journal article supplement — J Exp Bot. 2019 Apr 5;70(12):3255–68. doi: 10.1093/jxb/erz149 (PMC6598098; doi:10.1093/jxb/erz149), 2019-04-05

**Supplementary Material for:**

**“Key changes in gene expression identified for different stages of C<sub>4</sub> evolution in *Alloteropsis semialata*”**

**Authors:** Luke T. Dunning, Jose J. Moreno-Villena, Marjorie R. Lundgren, Jacqueline Dionora, Paolo Salazar, Claire Adams, Florence Nyirenda, Jill K. Olofsson, Anthony Mapaura, Isla M. Grundy, Canisius J. Kayombo, Lucy A. Dunning, Fabrice Kentatchime, Menaka Ariyaratne, Deepthi Yakandawala, Guillaume Besnard, W. Paul Quick, Andrea Bräutigam, Colin P. Osborne, Pascal-Antoine Christin

**This supplementary material contains eight tables and one figure:**

**Table S1:** List of enzymes considered as core C<sub>4</sub> enzymes.

**Table S2:** Information for populations sampled in triplicates.

**Table S3:** RNA-Seq data and mapping statistics for ten populations with triplicates.

**Table S4:** Pairwise differential expression test results for all genes.

**Table S5:** Leaf abundance, annotation, and summary of significance for all genes.

**Table S6:** Summary of differentially expressed genes referred to in Fig. 1.

**Table S7:** Summary of differentially expressed genes referred to in Fig. S1A.

**Table S8:** Summary of differentially expressed genes referred to in Fig. S1B.

**Figure S1:** Phylogenetic patterns of changes in gene expression in (A) *Alloteropsis angusta*, and (B) *Alloteropsis cimicina*.

**Table S1:** List of enzymes considered as core C<sub>4</sub> enzymes.

| <b>Protein</b> | <b>Enzyme</b>                     | <b>Gene ID</b> | <b>Number of genes in reference genome</b> |
|----------------|-----------------------------------|----------------|--------------------------------------------|
| ALA-AT         | alanine aminotransferase          | <i>alaat</i>   | 3                                          |
| ASP-AT         | aspartate aminotransferase        | <i>aspat</i>   | 4                                          |
| NAD-MDH        | NAD malate dehydrogenase          | <i>nadmdh</i>  | 11                                         |
| NAD-ME         | NAD malic enzyme                  | <i>nadme</i>   | 2                                          |
| NADP-MDH       | NADP malate dehydrogenase         | <i>nadpmdh</i> | 6                                          |
| NADP-ME        | NADP malic enzyme                 | <i>nadpme</i>  | 3                                          |
| PCK            | phosphoenolpyruvate carboxykinase | <i>pck</i>     | 2                                          |
| PEPC           | phosphoenolpyruvate carboxylase   | <i>ppc</i>     | 8                                          |
| PPDK           | pyruvate orthophosphate dikinase  | <i>ppdk</i>    | 2                                          |
| CA             | carbonic anhydrase                | <i>βca</i>     | 5                                          |

**Table S2:** Information for populations sampled in triplicates.

| Species                       | Photo.                         | Population           | Country      | Lat/long      | Sampling                                                                                           |
|-------------------------------|--------------------------------|----------------------|--------------|---------------|----------------------------------------------------------------------------------------------------|
| <i>Entolasia marginata</i>    | C <sub>3</sub>                 | EMAR1                | Australia    | -26.57,150.55 | 3 x clones of a single plant grown from seed                                                       |
| <i>Alloteropsis cimicina</i>  | C <sub>4</sub>                 | ACIM2                | Madagascar   | -             | 3 x different plants grown from seed                                                               |
| <i>Alloteropsis angusta</i>   | C <sub>4</sub>                 | AANG1                | Uganda       | 0.34,31.89    | 1 x plant collected as a live cuttings + 2 x clones of a single plant collected as a live cutting. |
| <i>Alloteropsis semialata</i> | C <sub>3</sub>                 | ZIM2                 | Zimbabwe     | -18.42,32.77  | 3 x different plants collected as live cuttings                                                    |
|                               |                                | RSA6 <sup>1</sup>    | South Africa | -33.32,26.53  | 3 x different plants collected as live cuttings                                                    |
|                               | C <sub>3</sub> +C <sub>4</sub> | TAN1602 <sup>1</sup> | Tanzania     | -8.35,31.28   | 3 x different plants collected as live cuttings                                                    |
|                               |                                | ZAM3 <sup>1</sup>    | Zambia       | -10.23,29.83  | 3 x different plants collected as live cuttings                                                    |
|                               | C <sub>4</sub>                 | CMR1 <sup>1</sup>    | Cameroon     | 5.93,10.62    | 3 x different plants collected as live cuttings                                                    |
|                               |                                | TAN4 <sup>1</sup>    | Tanzania     | -9.04,32.48   | 3 x different plants collected as live cuttings                                                    |
|                               |                                | PHI1 <sup>1</sup>    | Philippines  | 15.94,121.01  | 3 x different plants collected as live cuttings                                                    |

<sup>1</sup> Data retrieved from Dunning *et al.* (2019)

**Table S3:** RNA-Seq data and mapping statistics for ten populations with triplicates.

| Pop.    | Sample    | raw PE reads | Gbp  | Clean PE reads | Percentage of clean reads mapped |
|---------|-----------|--------------|------|----------------|----------------------------------|
| ACIM2   | ACIM2-1   | 5967276      | 1.29 | 5810460        | 43.26                            |
|         | ACIM2-2   | 3501357      | 0.76 | 3419398        | 41.14                            |
|         | ACIM2-3   | 3102005      | 0.67 | 3033994        | 33.47                            |
| EMAR1   | EMAR1-2   | 3928822      | 0.85 | 3849825        | 37.56                            |
|         | EMAR1-4A  | 3898055      | 0.84 | 3810471        | 34.58                            |
|         | EMAR1-4B  | 2500722      | 0.54 | 2439927        | 34.74                            |
| AANG1   | AANG1-6A  | 4618386      | 1.00 | 4332270        | 34.08                            |
|         | AANG1-6B  | 5997583      | 1.30 | 5836626        | 32.09                            |
|         | AANG1-6C  | 6009876      | 1.30 | 5866831        | 46.05                            |
| ZIM2    | ZIM2-1    | 2815050      | 0.61 | 2622817        | 57.19                            |
|         | ZIM2-5    | 3357287      | 0.73 | 3236198        | 57.55                            |
|         | ZIM2-10   | 5308033      | 1.15 | 4989635        | 64.43                            |
| RSA6    | RSA6-1    | 5284768      | 1.14 | 5193728        | 60.35                            |
|         | RSA6-7    | 4397850      | 0.95 | 4299225        | 68.02                            |
|         | RSA6-9    | 8129836      | 1.76 | 7964933        | 69.32                            |
| TAN1602 | TAN1602-1 | 10558384     | 2.28 | 10304872       | 59.92                            |
|         | TAN1602-2 | 8101223      | 1.75 | 7890990        | 64.87                            |
|         | TAN1602-3 | 2623196      | 0.57 | 2494198        | 54.53                            |
| ZAM3    | ZAM3-2    | 11178860     | 2.41 | 10897999       | 64.05                            |
|         | ZAM3-4    | 5146745      | 1.11 | 4992771        | 62.46                            |
|         | ZAM3-8    | 6118516      | 1.32 | 5853276        | 61.77                            |
| CMR1    | CMR1-2    | 12525719     | 2.71 | 12273903       | 65.09                            |
|         | CMR1-7    | 4385675      | 0.95 | 4282371        | 57.92                            |
|         | CMR1-10   | 2724267      | 0.59 | 2652363        | 65.58                            |
| TAN4    | TAN4-1    | 6581391      | 1.42 | 6393229        | 60.82                            |
|         | TAN4-3    | 7547915      | 1.63 | 7335642        | 62.60                            |
|         | TAN4-8    | 6089921      | 1.32 | 5932271        | 60.97                            |
| PHI1    | PHI1-1    | 4911514      | 1.06 | 4705864        | 68.31                            |
|         | PHI1-13   | 4643128      | 1.00 | 4441009        | 68.07                            |
|         | PHI1-17   | 5167456      | 1.12 | 5003163        | 68.31                            |

## Captions of supplementary figures

**Figure S1:** Phylogenetic patterns of changes in gene expression in (A) *Alloteropsis angusta* and (B) *Alloteropsis cimicina*. For each branch of the unrooted phylogeny from Fig. 1, the number of differentially expressed genes is indicated, with numbers next to arrows indicating those that are consistently up- or down-regulated as you move along the tree from the outgroup *Entolasia marginata*. Each population has three biological replicates, and colors indicate the photosynthetic type (blue = C<sub>3</sub>; green = C<sub>3</sub>+C<sub>4</sub>; red = C<sub>4</sub>). Scale indicates number of nucleotide substitutions per site, truncated branches are highlighted by two bars. For each tree, taxa excluded from the analyses are greyed.

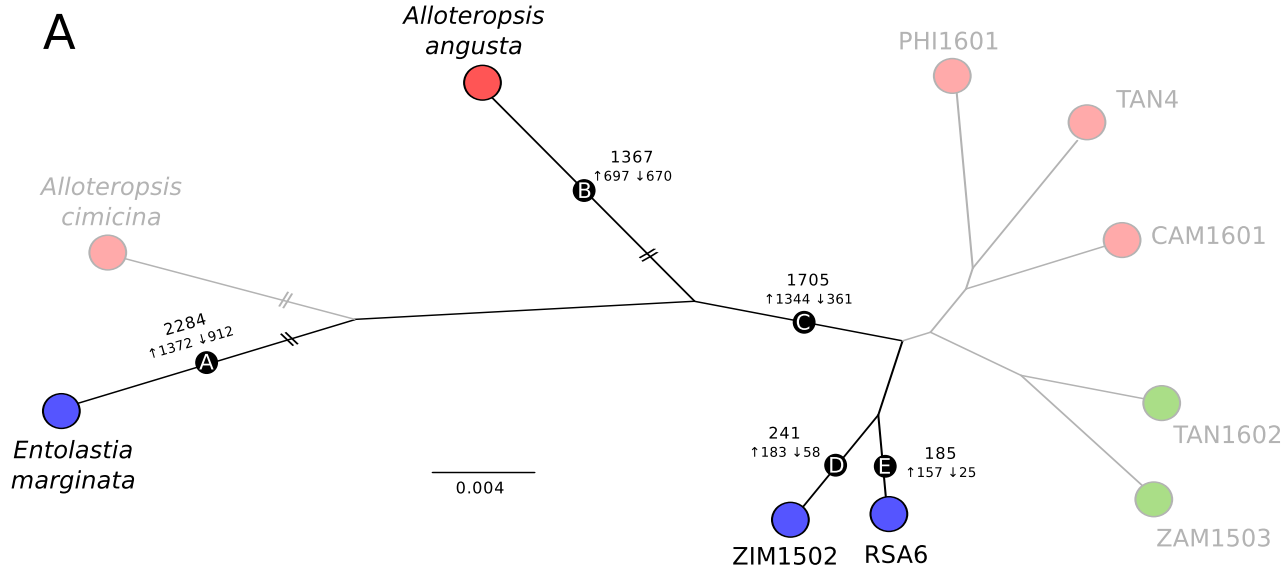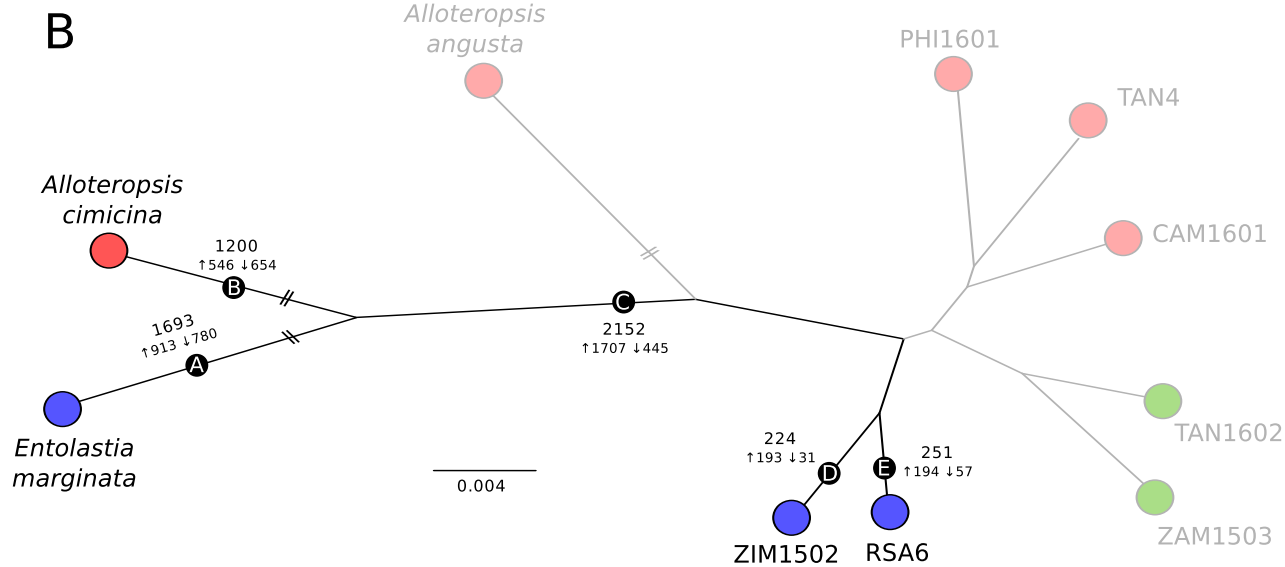

Supplement: erz149_suppl_supplementary-tables-s1-s3_figure-s1.pdf [file erz149_suppl_supplementary-tables-s1-s3_figure-s1.pdf]
